# Supplementary material for: High SLC2A1 expression associated with suppressing CD8 T cells and B cells promoted cancer survival in gastric cancer
Source: PubMed Central journal article supplement (PMC7971512; doi:10.1371/journal.pone.0245075), 2021-03-18
Supplement: pone.0245075.s002.pdf [file pone.0245075.s002.pdf]

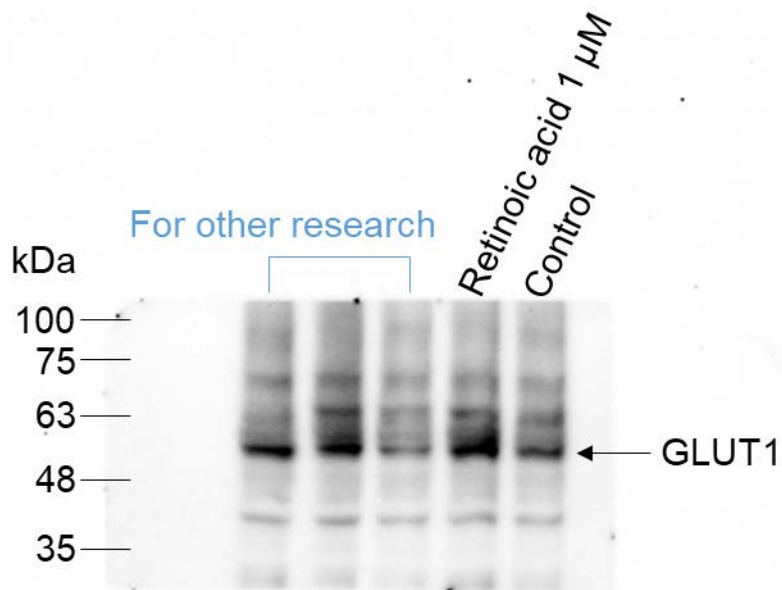

**S1 Fig.** Full-length gels and blots. The GLUT1 protein has a size of 55 kDa but varies slightly in shape depending on cell, antibody or experimental conditions.
