# Supplementary material for: High SLC2A1 expression associated with suppressing CD8 T cells and B cells promoted cancer survival in gastric cancer
Source: PubMed Central journal article supplement (PMC7971512; doi:10.1371/journal.pone.0245075), 2021-03-18
Supplement: pone.0245075.s003.pdf [file pone.0245075.s003.pdf]

**S1 Table** Clinicopathological parameters of Eulji cohort

| No | GLUT | Age (yo) | T stage | N stage | Location               | Size (cm) | Lauren classification | Histological grade | LI | VI | PNI | EBV |
|----|------|----------|---------|---------|------------------------|-----------|-----------------------|--------------------|----|----|-----|-----|
| 1  | -    | >65      | 3       | 0       | Cardia, fundus or body | >3        | intestinal            | moderately         | +  | +  | +   | -   |
| 2  | -    | >65      | 2       | 0       | Cardia, fundus or body | >3        | intestinal            | well               | +  | -  | -   | -   |
| 3  | -    | >65      | 1       | 0       | Cardia, fundus or body | ≤3        | diffuse               | signet             | -  | -  | -   | -   |
| 4  | -    | >65      | 1       | 0       | Cardia, fundus or body | >3        | intestinal            | moderately         | +  | -  | -   | -   |
| 5  | +    | >65      | 3       | 0       | Cardia, fundus or body | >3        | intestinal            | moderately         | +  | -  | +   | -   |
| 6  | +    | >65      | 3       | 3       | Antrum or pylorus      | >3        | mixed                 | moderately         | +  | +  | +   | -   |
| 7  | +    | >65      | 3       | 1       | Antrum or pylorus      | >3        | mixed                 | poorly             | +  | +  | +   | -   |
| 8  | +    | >65      | 1       | 0       | Antrum or pylorus      | >3        | intestinal            | well               | -  | -  | -   | -   |
| 9  | +    | >65      | 2       | 0       | Cardia, fundus or body | >3        | mixed                 | poorly             | +  | +  | +   | -   |
| 10 | +    | >65      | 1       | 0       | Antrum or pylorus      | ≤3        | intestinal            | well               | -  | -  | -   | -   |
| 11 | +    | >65      | 1       | 0       | Antrum or pylorus      | ≤3        | intestinal            | well               | -  | -  | -   | -   |
| 12 | -    | ≤65      | 1       | 0       | Cardia, fundus or body | ≤3        | intestinal            | moderately         | -  | -  | -   | -   |
| 13 | -    | >65      | 1       | 0       | Antrum or pylorus      | ≤3        | mixed                 | poorly             | -  | -  | -   | +   |
| 14 | +    | >65      | 3       | 0       | Cardia, fundus or body | ≤3        | diffuse               | signet             | -  | -  | -   | -   |
| 15 | +    | ≤65      | 1       | 1       | Cardia, fundus or body | ≤3        | intestinal            | moderately         | +  | -  | -   | -   |
| 16 | +    | >65      | 1       | 0       | Cardia, fundus or body | ≤3        | intestinal            | moderately         | -  | -  | -   | -   |
| 17 | -    | ≤65      | 3       | 0       | Antrum or pylorus      | ≤3        | mixed                 | poorly             | -  | -  | +   | -   |
| 18 | +    | >65      | 2       | 1       | Cardia, fundus or body | >3        | intestinal            | moderately         | +  | +  | -   | -   |
| 19 | -    | ≤65      | 3       | 0       | Antrum or pylorus      | ≤3        | mixed                 | poorly             | -  | -  | +   | -   |
| 20 | +    | ≤65      | 3       | 2       | Cardia, fundus or body | >3        | mixed                 | poorly             | +  | +  | -   | -   |
| 21 | +    | >65      | 1       | 0       | Antrum or pylorus      | ≤3        | intestinal            | well               | -  | -  | -   | -   |

|    |   |     |   |   |                        |    |            |            |   |   |   |   |
|----|---|-----|---|---|------------------------|----|------------|------------|---|---|---|---|
| 22 | - | >65 | 3 | 3 | Cardia, fundus or body | >3 | diffuse    | signet     | + | + | - | + |
| 23 | - | >65 | 2 | 3 | Cardia, fundus or body | >3 | diffuse    | signet     | + | + | - | + |
| 24 | - | >65 | 1 | 0 | Antrum or pylorus      | ≤3 | intestinal | well       | - | - | - | - |
| 25 | - | >65 | 1 | 0 | Antrum or pylorus      | >3 | intestinal | moderately | - | - | - | - |
| 26 | + | ≤65 | 2 | 3 | Cardia, fundus or body | >3 | diffuse    | poorly     | + | + | - | - |
| 27 | - | >65 | 4 | 3 | Cardia, fundus or body | >3 | diffuse    | poorly     | - | - | + | - |
| 28 | + | ≤65 | 3 | 2 | Antrum or pylorus      | >3 | mixed      | poorly     | + | + | - | - |
| 29 | - | ≤65 | 4 | 3 | Cardia, fundus or body | >3 | diffuse    | signet     | + | - | + | - |
| 30 | + | ≤65 | 1 | 0 | Antrum or pylorus      | ≤3 | intestinal | moderately | - | - | - | - |
| 31 | - | ≤65 | 1 | 0 | Cardia, fundus or body | ≤3 | diffuse    | signet     | - | - | - | - |
| 32 | + | ≤65 | 4 | 0 | Cardia, fundus or body | >3 | mixed      | poorly     | - | - | + | - |
| 33 | - | ≤65 | 1 | 0 | Cardia, fundus or body | ≤3 | intestinal | well       | - | - | - | + |
| 34 | - | ≤65 | 1 | 0 | Antrum or pylorus      | ≤3 | mixed      | poorly     | - | - | - | - |
| 35 | + | ≤65 | 3 | 0 | Cardia, fundus or body | >3 | mixed      | poorly     | + | + | + | - |
| 36 | + | >65 | 1 | 0 | Cardia, fundus or body | ≤3 | intestinal | moderately | - | - | - | - |
| 37 | + | ≤65 | 3 | 3 | Antrum or pylorus      | >3 | intestinal | moderately | - | - | - | - |
| 38 | + | ≤65 | 4 | 3 | Antrum or pylorus      | >3 | diffuse    | signet     | + | + | + | - |
| 39 | + | >65 | 3 | 3 | Antrum or pylorus      | >3 | intestinal | moderately | + | - | + | - |
| 40 | - | >65 | 1 | 0 | Cardia, fundus or body | ≤3 | intestinal | well       | - | - | - | - |
| 41 | - | >65 | 3 | 0 | Antrum or pylorus      | ≤3 | diffuse    | signet     | - | - | + | - |
| 42 | + | >65 | 1 | 0 | Antrum or pylorus      | >3 | mixed      | poorly     | - | - | - | - |
| 43 | + | ≤65 | 3 | 0 | Antrum or pylorus      | >3 | mixed      | signet     | - | - | + | - |
| 44 | + | >65 | 1 | 1 | Antrum or pylorus      | ≤3 | intestinal | moderately | + | - | - | - |
| 45 | + | >65 | 3 | 0 | Antrum or pylorus      | >3 | intestinal | moderately | - | - | - | - |

|    |   |     |   |   |                        |    |            |            |   |   |   |   |
|----|---|-----|---|---|------------------------|----|------------|------------|---|---|---|---|
| 46 | - | >65 | 1 | 0 | Cardia, fundus or body | >3 | diffuse    | signet     | - | - | - | - |
| 47 | + | ≤65 | 4 | 2 | Antrum or pylorus      | >3 | mixed      | poorly     | + | - | + | - |
| 48 | - | ≤65 | 4 | 0 | Antrum or pylorus      | ≤3 | diffuse    | signet     | - | - | - | - |
| 49 | + | >65 | 3 | 1 | Cardia, fundus or body | >3 | intestinal | moderately | + | - | + | - |
| 50 | + | >65 | 1 | 2 | Antrum or pylorus      | >3 | intestinal | moderately | + | - | - | - |
| 51 | + | >65 | 3 | 3 | Antrum or pylorus      | >3 | mixed      | poorly     | + | + | - | - |
| 52 | - | ≤65 | 1 | 0 | Antrum or pylorus      | ≤3 | diffuse    | signet     | - | - | - | - |
| 53 | + | >65 | 3 | 0 | Antrum or pylorus      | >3 | intestinal | moderately | + | + | + | - |
| 54 | + | ≤65 | 1 | 2 | Antrum or pylorus      | >3 | mixed      | signet     | + | - | - | - |
| 55 | - | >65 | 1 | 0 | Cardia, fundus or body | ≤3 | intestinal | well       | - | - | - | - |
| 56 | - | ≤65 | 2 | 0 | Antrum or pylorus      | >3 | mixed      | poorly     | - | - | - | - |
| 57 | - | >65 | 2 | 1 | Cardia, fundus or body | >3 | diffuse    | signet     | + | - | - | - |
| 58 | + | >65 | 3 | 0 | Cardia, fundus or body | >3 | diffuse    | signet     | - | - | - | - |
| 59 | - | >65 | 1 | 0 | Antrum or pylorus      | >3 | intestinal | moderately | + | - | - | - |
| 60 | - | >65 | 4 | 3 | Antrum or pylorus      | >3 | diffuse    | signet     | + | + | + | + |
| 61 | - | >65 | 1 | 0 | Antrum or pylorus      | >3 | intestinal | well       | + | - | - | - |
| 62 | + | >65 | 4 | 3 | Antrum or pylorus      | >3 | diffuse    | signet     | + | - | + | - |
| 63 | - | >65 | 1 | 0 | Cardia, fundus or body | ≤3 | diffuse    | signet     | - | - | - | - |
| 64 | + | >65 | 1 | 3 | Cardia, fundus or body | >3 | mixed      | poorly     | + | + | + | - |
| 65 | - | >65 | 1 | 0 | Antrum or pylorus      | >3 | mixed      | signet     | - | - | - | - |
| 66 | + | >65 | 4 | 0 | Antrum or pylorus      | >3 | intestinal | signet     | + | + | - | - |
| 67 | - | >65 | 3 | 1 | Antrum or pylorus      | >3 | intestinal | moderately | + | + | + | - |
| 68 | - | ≤65 | 3 | 3 | Antrum or pylorus      | >3 | diffuse    | poorly     | + | - | + | - |
| 69 | - | ≤65 | 1 | 0 | Cardia, fundus or body | >3 | intestinal | moderately | - | - | - | - |

|    |   |     |   |   |                        |    |            |            |   |   |   |   |
|----|---|-----|---|---|------------------------|----|------------|------------|---|---|---|---|
| 70 | + | ≤65 | 1 | 0 | Antrum or pylorus      | ≤3 | intestinal | moderately | - | - | - | - |
| 71 | + | >65 | 3 | 0 | Antrum or pylorus      | >3 | intestinal | moderately | + | - | - | - |
| 72 | - | ≤65 | 4 | 2 | Cardia, fundus or body | >3 | intestinal | moderately | + | - | + | - |
| 73 | - | >65 | 1 | 0 | Cardia, fundus or body | >3 | intestinal | moderately | - | - | - | - |
| 74 | + | ≤65 | 1 | 0 | Antrum or pylorus      | >3 | mixed      | signet     | + | + | - | - |
| 75 | + | >65 | 2 | 0 | Cardia, fundus or body | ≤3 | intestinal | moderately | + | - | - | - |
| 76 | - | >65 | 2 | 1 | Cardia, fundus or body | >3 | intestinal | moderately | + | - | - | - |
| 77 | + | >65 | 3 | 3 | Cardia, fundus or body | >3 | intestinal | moderately | + | + | - | - |
| 78 | + | >65 | 1 | 0 | Cardia, fundus or body | ≤3 | intestinal | moderately | - | - | - | - |
| 79 | + | >65 | 4 | 3 | Antrum or pylorus      | >3 | mixed      | poorly     | + | + | - | - |
| 80 | + | >65 | 1 | 0 | Cardia, fundus or body | >3 | intestinal | moderately | - | - | - | - |
| 81 | - | >65 | 1 | 0 | Cardia, fundus or body | ≤3 | diffuse    | poorly     | - | - | + | - |
| 82 | + | >65 | 4 | 2 | Antrum or pylorus      | >3 | mixed      | poorly     | + | - | - | - |
| 83 | + | ≤65 | 3 | 2 | Antrum or pylorus      | >3 | intestinal | moderately | + | - | - | - |
| 84 | + | >65 | 1 | 0 | Antrum or pylorus      | >3 | intestinal | well       | - | - | - | - |
| 85 | + | ≤65 | 1 | 0 | Antrum or pylorus      | >3 | intestinal | well       | + | - | - | - |
| 86 | - | >65 | 1 | 0 | Cardia, fundus or body | >3 | mixed      | poorly     | + | - | - | + |
| 87 | - | >65 | 1 | 0 | Antrum or pylorus      | ≤3 | mixed      | poorly     | - | - | - | - |
| 88 | + | >65 | 1 | 0 | Cardia, fundus or body | ≤3 | intestinal | moderately | + | - | - | - |
| 89 | + | ≤65 | 4 | 3 | Antrum or pylorus      | >3 | diffuse    | signet     | + | - | + | - |
| 90 | + | >65 | 1 | 0 | Antrum or pylorus      | ≤3 | intestinal | moderately | - | - | - | - |
| 91 | - | >65 | 3 | 0 | Cardia, fundus or body | ≤3 | mixed      | poorly     | - | - | + | - |
| 92 | + | >65 | 3 | 1 | Antrum or pylorus      | >3 | intestinal | moderately | + | + | + | - |
| 93 | + | ≤65 | 1 | 0 | Antrum or pylorus      | >3 | mixed      | signet     | - | - | - | - |

|     |   |     |   |   |                        |    |            |            |   |   |   |   |
|-----|---|-----|---|---|------------------------|----|------------|------------|---|---|---|---|
| 94  | + | ≤65 | 1 | 0 | Antrum or pylorus      | >3 | intestinal | moderately | - | - | - | - |
| 95  | - | >65 | 1 | 0 | Antrum or pylorus      | ≤3 | intestinal | moderately | - | - | - | - |
| 96  | - | >65 | 1 | 0 | Cardia, fundus or body | ≤3 | intestinal | moderately | - | - | - | - |
| 97  | - | >65 | 1 | 0 | Cardia, fundus or body | ≤3 | diffuse    | signet     | - | - | - | - |
| 98  | - | >65 | 1 | 0 | Cardia, fundus or body | ≤3 | intestinal | well       | - | - | - | - |
| 99  | + | ≤65 | 1 | 0 | Cardia, fundus or body | >3 | intestinal | well       | + | + | - | - |
| 100 | - | ≤65 | 1 | 0 | Antrum or pylorus      | ≤3 | intestinal | moderately | - | - | - | - |
| 101 | - | ≤65 | 3 | 0 | Antrum or pylorus      | >3 | diffuse    | signet     | + | - | - | - |
| 102 | + | >65 | 1 | 0 | Antrum or pylorus      | ≤3 | intestinal | moderately | - | - | - | - |
| 103 | - | >65 | 1 | 0 | Antrum or pylorus      | ≤3 | intestinal | moderately | - | - | - | - |
| 104 | - | >65 | 2 | 3 | Antrum or pylorus      | >3 | intestinal | signet     | + | - | - | - |
| 105 | + | >65 | 1 | 0 | Antrum or pylorus      | >3 | diffuse    | poorly     | + | - | - | - |
| 106 | - | >65 | 1 | 0 | Antrum or pylorus      | ≤3 | intestinal | well       | - | - | - | - |
| 107 | + | >65 | 3 | 0 | Antrum or pylorus      | >3 | intestinal | moderately | + | - | - | - |
| 108 | - | ≤65 | 1 | 0 | Cardia, fundus or body | >3 | intestinal | moderately | - | - | - | - |
| 109 | + | >65 | 1 | 0 | Cardia, fundus or body | ≤3 | intestinal | moderately | + | - | - | - |
| 110 | - | >65 | 1 | 2 | Cardia, fundus or body | >3 | mixed      | poorly     | - | - | - | - |
| 111 | - | >65 | 1 | 1 | Antrum or pylorus      | >3 | intestinal | poorly     | + | - | - | - |
| 112 | - | >65 | 1 | 0 | Antrum or pylorus      | >3 | intestinal | well       | - | - | - | - |
| 113 | + | >65 | 1 | 2 | Cardia, fundus or body | ≤3 | intestinal | moderately | + | - | - | - |
| 114 | + | ≤65 | 1 | 0 | Antrum or pylorus      | ≤3 | intestinal | moderately | - | - | - | + |
| 115 | - | >65 | 1 | 0 | Antrum or pylorus      | ≤3 | diffuse    | signet     | - | - | - | - |
| 116 | - | >65 | 1 | 0 | Antrum or pylorus      | >3 | diffuse    | signet     | - | - | - | - |
| 117 | + | >65 | 3 | 3 | Antrum or pylorus      | >3 | intestinal | moderately | + | + | - | - |

|     |   |     |   |   |                        |    |            |            |   |   |   |   |
|-----|---|-----|---|---|------------------------|----|------------|------------|---|---|---|---|
| 118 | - | ≤65 | 1 | 0 | Antrum or pylorus      | ≤3 | intestinal | moderately | - | - | - | - |
| 119 | - | >65 | 1 | 0 | Antrum or pylorus      | >3 | mixed      | poorly     | + | - | - | - |
| 120 | - | ≤65 | 1 | 1 | Cardia, fundus or body | >3 | diffuse    | signet     | + | - | - | - |
| 121 | - | >65 | 1 | 0 | Antrum or pylorus      | >3 | intestinal | moderately | - | - | - | - |
| 122 | - | >65 | 1 | 0 | Antrum or pylorus      | ≤3 | intestinal | well       | - | - | - | - |
| 123 | - | >65 | 1 | 0 | Antrum or pylorus      | ≤3 | intestinal | well       | + | - | - | - |
| 124 | - | ≤65 | 1 | 0 | Cardia, fundus or body | >3 | diffuse    | signet     | - | - | - | - |
| 125 | - | >65 | 1 | 0 | Cardia, fundus or body | ≤3 | intestinal | poorly     | + | - | - | - |
| 126 | - | >65 | 1 | 0 | Antrum or pylorus      | ≤3 | mixed      | poorly     | - | - | - | - |
| 127 | - | ≤65 | 1 | 0 | Antrum or pylorus      | ≤3 | intestinal | moderately | - | - | - | - |
| 128 | - | >65 | 1 | 0 | Antrum or pylorus      | >3 | mixed      | poorly     | - | - | - | - |
| 129 | - | >65 | 1 | 0 | Antrum or pylorus      | >3 | diffuse    | poorly     | - | - | - | - |
| 130 | + | >65 | 1 | 1 | Antrum or pylorus      | ≤3 | mixed      | poorly     | - | - | - | - |
| 131 | - | >65 | 1 | 0 | Antrum or pylorus      | ≤3 | intestinal | moderately | - | - | - | - |
| 132 | + | ≤65 | 1 | 0 | Antrum or pylorus      | ≤3 | intestinal | moderately | - | - | - | - |
| 133 | + | >65 | 1 | 0 | Antrum or pylorus      | ≤3 | mixed      | poorly     | - | - | + | - |
| 134 | + | >65 | 1 | 0 | Antrum or pylorus      | >3 | intestinal | moderately | + | + | - | - |
| 135 | + | ≤65 | 4 | 3 | Antrum or pylorus      | >3 | intestinal | moderately | + | - | + | + |
| 136 | - | >65 | 3 | 3 | Cardia, fundus or body | ≤3 | diffuse    | signet     | + | - | + | - |
| 137 | - | ≤65 | 3 | 0 | Cardia, fundus or body | ≤3 | intestinal | moderately | + | - | - | - |
| 138 | - | >65 | 1 | 0 | Cardia, fundus or body | >3 | diffuse    | signet     | - | - | - | - |
| 139 | + | ≤65 | 1 | 0 | Antrum or pylorus      | ≤3 | intestinal | well       | - | - | - | - |
| 140 | + | ≤65 | 4 | 3 | Cardia, fundus or body | >3 | diffuse    | signet     | + | - | + | - |
| 141 | + | >65 | 2 | 1 | Antrum or pylorus      | >3 | intestinal | moderately | + | - | - | + |

|     |   |     |   |   |                        |    |            |            |   |   |   |   |
|-----|---|-----|---|---|------------------------|----|------------|------------|---|---|---|---|
| 142 | - | ≤65 | 1 | 0 | Antrum or pylorus      | >3 | intestinal | well       | - | - | - | - |
| 143 | + | ≤65 | 1 | 0 | Antrum or pylorus      | ≤3 | intestinal | moderately | - | - | - | - |
| 144 | - | >65 | 4 | 3 | Antrum or pylorus      | >3 | diffuse    | signet     | + | - | + | - |
| 145 | + | >65 | 1 | 0 | Cardia, fundus or body | ≤3 | mixed      | poorly     | - | - | - | - |
| 146 | - | >65 | 1 | 0 | Antrum or pylorus      | ≤3 | intestinal | well       | - | - | - | - |
| 147 | - | >65 | 1 | 0 | Antrum or pylorus      | ≤3 | intestinal | well       | - | - | - | - |
| 148 | + | >65 | 1 | 0 | Antrum or pylorus      | ≤3 | intestinal | moderately | - | - | - | - |
| 149 | + | >65 | 1 | 0 | Cardia, fundus or body | ≤3 | intestinal | moderately | - | - | - | - |
| 150 | - | ≤65 | 1 | 0 | Cardia, fundus or body | ≤3 | diffuse    | signet     | - | - | - | - |
| 151 | - | ≤65 | 1 | 0 | Antrum or pylorus      | >3 | intestinal | signet     | - | - | - | - |
| 152 | + | ≤65 | 1 | 0 | Antrum or pylorus      | ≤3 | intestinal | moderately | - | - | - | - |
| 153 | - | >65 | 1 | 0 | Antrum or pylorus      | >3 | intestinal | well       | - | - | - | - |
| 154 | - | >65 | 1 | 0 | Cardia, fundus or body | >3 | diffuse    | signet     | - | - | - | - |
| 155 | + | >65 | 4 | 3 | Antrum or pylorus      | >3 | mixed      | poorly     | + | - | + | + |
| 156 | + | ≤65 | 1 | 0 | Antrum or pylorus      | ≤3 | intestinal | well       | - | - | - | - |
| 157 | + | >65 | 1 | 0 | Antrum or pylorus      | ≤3 | intestinal | moderately | - | - | - | - |
| 158 | - | >65 | 1 | 0 | Cardia, fundus or body | ≤3 | intestinal | well       | - | - | - | - |
| 159 | - | >65 | 1 | 0 | Antrum or pylorus      | ≤3 | intestinal | moderately | - | - | - | - |
| 160 | + | >65 | 3 | 2 | Antrum or pylorus      | >3 | intestinal | moderately | + | - | + | - |
| 161 | - | ≤65 | 3 | 0 | Cardia, fundus or body | >3 | diffuse    | signet     | + | - | + | - |
| 162 | + | >65 | 4 | 3 | Antrum or pylorus      | >3 | intestinal | moderately | + | + | - | - |
| 163 | - | >65 | 1 | 0 | Antrum or pylorus      | ≤3 | intestinal | moderately | - | - | - | - |
| 164 | - | ≤65 | 1 | 0 | Antrum or pylorus      | ≤3 | intestinal | well       | - | - | - | - |
| 165 | + | ≤65 | 3 | 3 | Antrum or pylorus      | >3 | intestinal | moderately | + | - | + | - |

|     |   |     |   |   |                        |    |            |            |   |   |   |   |
|-----|---|-----|---|---|------------------------|----|------------|------------|---|---|---|---|
| 166 | - | >65 | 3 | 1 | Antrum or pylorus      | ≤3 | mixed      | poorly     | + | - | - | - |
| 167 | + | ≤65 | 1 | 0 | Antrum or pylorus      | ≤3 | intestinal | well       | - | - | - | - |
| 168 | - | >65 | 1 | 0 | Antrum or pylorus      | ≤3 | intestinal | well       | - | - | - | - |
| 169 | - | >65 | 1 | 0 | Antrum or pylorus      | ≤3 | intestinal | moderately | - | - | - | - |
| 170 | - | ≤65 | 1 | 0 | Antrum or pylorus      | ≤3 | intestinal | moderately | - | - | - | - |
| 171 | - | >65 | 1 | 0 | Cardia, fundus or body | ≤3 | intestinal | well       | - | - | - | + |
| 172 | - | >65 | 1 | 0 | Cardia, fundus or body | ≤3 | intestinal | moderately | - | - | - | - |
| 173 | + | >65 | 1 | 0 | Cardia, fundus or body | ≤3 | intestinal | well       | - | - | - | - |
| 174 | + | >65 | 1 | 0 | Antrum or pylorus      | ≤3 | intestinal | moderately | - | - | - | - |
| 175 | + | >65 | 4 | 3 | Cardia, fundus or body | >3 | intestinal | moderately | + | - | - | + |
| 176 | - | ≤65 | 4 | 3 | Antrum or pylorus      | >3 | diffuse    | signet     | + | - | - | - |
| 177 | - | >65 | 3 | 3 | Antrum or pylorus      | >3 | diffuse    | signet     | + | - | + | - |
| 178 | + | >65 | 1 | 0 | Antrum or pylorus      | >3 | intestinal | moderately | - | - | - | - |
| 179 | - | ≤65 | 3 | 0 | Antrum or pylorus      | >3 | diffuse    | signet     | - | - | + | - |
| 180 | + | >65 | 4 | 0 | Antrum or pylorus      | >3 | diffuse    | signet     | + | - | + | + |
| 181 | - | >65 | 1 | 0 | Antrum or pylorus      | >3 | intestinal | moderately | - | - | - | - |
| 182 | - | >65 | 1 | 0 | Antrum or pylorus      | ≤3 | intestinal | well       | + | - | - | + |
| 183 | - | >65 | 1 | 0 | Antrum or pylorus      | ≤3 | intestinal | well       | - | - | - | - |
| 184 | + | ≤65 | 1 | 0 | Cardia, fundus or body | ≤3 | intestinal | moderately | - | - | - | - |
| 185 | + | >65 | 1 | 0 | Antrum or pylorus      | ≤3 | intestinal | moderately | - | - | - | - |
| 186 | + | >65 | 1 | 0 | Cardia, fundus or body | >3 | diffuse    | signet     | - | - | - | - |
| 187 | + | >65 | 3 | 2 | Cardia, fundus or body | >3 | intestinal | moderately | + | - | - | - |
| 188 | + | >65 | 3 | 2 | Antrum or pylorus      | >3 | mixed      | poorly     | + | - | + | - |
| 189 | + | >65 | 1 | 0 | Cardia, fundus or body | >3 | intestinal | moderately | - | - | - | - |

|     |   |     |   |   |                        |    |            |            |   |   |   |   |
|-----|---|-----|---|---|------------------------|----|------------|------------|---|---|---|---|
| 190 | + | >65 | 1 | 0 | Antrum or pylorus      | ≤3 | intestinal | moderately | - | - | - | - |
| 191 | + | >65 | 2 | 3 | Cardia, fundus or body | >3 | intestinal | moderately | + | - | - | - |
| 192 | + | >65 | 1 | 0 | Cardia, fundus or body | ≤3 | intestinal | moderately | - | - | - | - |
| 193 | - | ≤65 | 1 | 0 | Antrum or pylorus      | ≤3 | intestinal | well       | - | - | - | - |
| 194 | + | >65 | 4 | 3 | Cardia, fundus or body | >3 | diffuse    | poorly     | + | + | + | + |
| 195 | - | >65 | 3 | 1 | Antrum or pylorus      | >3 | mixed      | poorly     | - | - | + | - |
| 196 | + | >65 | 3 | 0 | Antrum or pylorus      | >3 | intestinal | moderately | - | + | - | + |
| 197 | - | ≤65 | 2 | 0 | Antrum or pylorus      | ≤3 | diffuse    | signet     | - | - | + | - |
| 198 | + | >65 | 4 | 2 | Antrum or pylorus      | ≤3 | intestinal | moderately | + | - | + | + |
| 199 | + | >65 | 1 | 0 | Antrum or pylorus      | >3 | intestinal | moderately | - | - | - | - |
| 200 | - | ≤65 | 1 | 0 | Antrum or pylorus      | >3 | intestinal | moderately | - | - | - | - |
| 201 | - | ≤65 | 4 | 1 | Cardia, fundus or body | ≤3 | diffuse    | signet     | + | - | - | - |
| 202 | - | >65 | 4 | 2 | Antrum or pylorus      | >3 | mixed      | poorly     | + | - | + | - |
| 203 | + | ≤65 | 1 | 0 | Antrum or pylorus      | >3 | intestinal | moderately | - | - | - | - |
| 204 | - | >65 | 1 | 0 | Antrum or pylorus      | ≤3 | intestinal | signet     | - | - | - | - |
| 205 | - | >65 | 1 | 0 | Antrum or pylorus      | ≤3 | intestinal | signet     | - | - | - | - |
| 206 | - | ≤65 | 4 | 3 | Cardia, fundus or body | >3 | diffuse    | signet     | + | + | + | - |
| 207 | + | >65 | 1 | 0 | Antrum or pylorus      | ≤3 | intestinal | well       | - | - | - | - |
| 208 | - | >65 | 1 | 0 | Antrum or pylorus      | >3 | intestinal | moderately | - | - | - | - |
| 209 | - | >65 | 4 | 3 | Antrum or pylorus      | >3 | mixed      | signet     | + | - | - | - |
| 210 | + | >65 | 1 | 0 | Antrum or pylorus      | ≤3 | intestinal | moderately | - | - | - | - |
| 211 | + | ≤65 | 3 | 3 | Cardia, fundus or body | >3 | diffuse    | poorly     | + | - | + | - |
| 212 | + | >65 | 4 | 3 | Antrum or pylorus      | >3 | intestinal | moderately | + | + | + | - |
| 213 | - | >65 | 1 | 1 | Antrum or pylorus      | ≤3 | intestinal | moderately | + | - | - | - |

|     |   |     |   |   |                        |    |            |            |   |   |   |   |
|-----|---|-----|---|---|------------------------|----|------------|------------|---|---|---|---|
| 214 | + | >65 | 2 | 2 | Antrum or pylorus      | >3 | intestinal | moderately | + | - | - | - |
| 215 | + | >65 | 4 | 1 | Cardia, fundus or body | >3 | mixed      | poorly     | + | + | + | - |
| 216 | + | >65 | 4 | 2 | Cardia, fundus or body | >3 | intestinal | moderately | + | - | - | + |
| 217 | + | >65 | 2 | 0 | Cardia, fundus or body | >3 | intestinal | well       | - | - | - | - |
| 218 | + | >65 | 4 | 2 | Antrum or pylorus      | >3 | intestinal | moderately | + | - | - | - |
| 219 | + | ≤65 | 4 | 3 | Cardia, fundus or body | >3 | intestinal | moderately | + | + | + | - |
| 220 | + | >65 | 1 | 0 | Antrum or pylorus      | >3 | intestinal | signet     | - | - | - | - |
| 221 | + | >65 | 3 | 3 | Antrum or pylorus      | ≤3 | intestinal | moderately | + | - | + | - |
| 222 | - | ≤65 | 4 | 1 | Cardia, fundus or body | >3 | diffuse    | signet     | + | - | - | - |
| 223 | + | ≤65 | 1 | 0 | Antrum or pylorus      | ≤3 | intestinal | well       | - | - | - | - |
| 224 | - | >65 | 1 | 1 | Antrum or pylorus      | ≤3 | diffuse    | signet     | - | - | - | - |
| 225 | - | >65 | 3 | 0 | Antrum or pylorus      | ≤3 | intestinal | poorly     | + | + | - | - |
| 226 | + | ≤65 | 3 | 3 | Antrum or pylorus      | ≤3 | diffuse    | signet     | + | - | - | + |
| 227 | + | >65 | 2 | 0 | Antrum or pylorus      | >3 | intestinal | moderately | - | - | - | - |
| 228 | - | >65 | 1 | 0 | Cardia, fundus or body | ≤3 | intestinal | moderately | - | - | - | - |
| 229 | + | >65 | 4 | 3 | Antrum or pylorus      | >3 | mixed      | poorly     | + | + | + | - |
| 230 | + | >65 | 4 | 3 | Antrum or pylorus      | >3 | intestinal | moderately | + | + | - | - |
| 231 | + | >65 | 2 | 0 | Antrum or pylorus      | >3 | intestinal | moderately | - | - | - | - |
| 232 | + | >65 | 3 | 3 | Antrum or pylorus      | >3 | intestinal | moderately | + | - | - | - |
| 233 | - | ≤65 | 2 | 3 | Antrum or pylorus      | >3 | intestinal | poorly     | + | - | - | - |
| 234 | - | ≤65 | 1 | 0 | Cardia, fundus or body | ≤3 | diffuse    | signet     | - | - | - | - |
| 235 | + | >65 | 1 | 0 | Antrum or pylorus      | ≤3 | intestinal | well       | - | - | - | - |
| 236 | + | >65 | 4 | 3 | Cardia, fundus or body | >3 | mixed      | signet     | + | - | - | - |
| 237 | - | ≤65 | 1 | 0 | Antrum or pylorus      | >3 | diffuse    | signet     | - | - | - | - |

|     |   |     |   |   |                        |    |            |            |   |   |   |   |
|-----|---|-----|---|---|------------------------|----|------------|------------|---|---|---|---|
| 238 | + | >65 | 2 | 1 | Antrum or pylorus      | >3 | intestinal | moderately | + | + | - | - |
| 239 | - | ≤65 | 1 | 0 | Antrum or pylorus      | ≤3 | diffuse    | signet     | - | - | - | - |
| 240 | + | >65 | 4 | 3 | Cardia, fundus or body | >3 | mixed      | signet     | + | + | + | + |
| 241 | + | >65 | 4 | 3 | Antrum or pylorus      | >3 | diffuse    | signet     | + | + | - | - |
| 242 | - | ≤65 | 1 | 0 | Antrum or pylorus      | >3 | intestinal | well       | - | - | - | - |
| 243 | - | >65 | 1 | 0 | Cardia, fundus or body | >3 | diffuse    | signet     | - | - | - | - |
| 244 | - | >65 | 1 | 0 | Antrum or pylorus      | >3 | intestinal | moderately | - | - | - | - |
| 245 | - | >65 | 2 | 3 | Antrum or pylorus      | ≤3 | intestinal | poorly     | - | - | + | - |
| 246 | + | >65 | 1 | 0 | Antrum or pylorus      | >3 | intestinal | moderately | - | - | - | - |
| 247 | - | >65 | 1 | 0 | Cardia, fundus or body | >3 | intestinal | poorly     | - | - | - | - |
| 248 | + | ≤65 | 1 | 0 | Antrum or pylorus      | ≤3 | intestinal | poorly     | + | + | - | + |
| 249 | + | >65 | 1 | 0 | Antrum or pylorus      | ≤3 | intestinal | poorly     | - | - | - | - |
| 250 | - | >65 | 1 | 0 | Cardia, fundus or body | >3 | intestinal | moderately | - | - | - | + |
| 251 | + | ≤65 | 1 | 1 | Antrum or pylorus      | ≤3 | intestinal | moderately | - | - | - | + |
| 252 | + | >65 | 1 | 0 | Antrum or pylorus      | ≤3 | intestinal | well       | - | - | - | - |
| 253 | + | >65 | 1 | 0 | Antrum or pylorus      | >3 | intestinal | moderately | - | - | - | + |
| 254 | + | >65 | 1 | 0 | Antrum or pylorus      | >3 | intestinal | well       | - | - | - | - |
| 255 | + | >65 | 3 | 1 | Cardia, fundus or body | ≤3 | intestinal | poorly     | + | - | - | + |
| 256 | - | >65 | 1 | 0 | Antrum or pylorus      | ≤3 | diffuse    | poorly     | - | - | - | - |
| 257 | + | >65 | 4 | 3 | Antrum or pylorus      | >3 | intestinal | moderately | + | + | - | + |
| 258 | + | >65 | 4 | 2 | Antrum or pylorus      | ≤3 | intestinal | moderately | - | - | - | + |
| 259 | - | >65 | 4 | 3 | Cardia, fundus or body | ≤3 | intestinal | moderately | + | - | - | + |
| 260 | + | >65 | 4 | 3 | Cardia, fundus or body | >3 | intestinal | poorly     | + | + | - | + |
| 261 | - | >65 | 4 | 1 | Antrum or pylorus      | >3 | intestinal | signet     | - | - | - | - |

|     |   |     |   |   |                        |    |            |            |   |   |   |   |
|-----|---|-----|---|---|------------------------|----|------------|------------|---|---|---|---|
| 262 | - | >65 | 1 | 0 | Antrum or pylorus      | ≤3 | intestinal | moderately | + | - | - | - |
| 263 | + | ≤65 | 1 | 0 | Cardia, fundus or body | >3 | intestinal | moderately | - | - | - | - |
| 264 | + | >65 | 4 | 3 | Cardia, fundus or body | ≤3 | intestinal | moderately | + | + | - | + |
| 265 | - | >65 | 1 | 0 | Cardia, fundus or body | >3 | intestinal | moderately | - | - | - | - |
| 266 | + | >65 | 3 | 3 | Antrum or pylorus      | >3 | intestinal | moderately | + | + | - | - |
| 267 | - | >65 | 3 | 3 | Cardia, fundus or body | >3 | diffuse    | signet     | + | + | - | + |
| 268 | + | >65 | 4 | 2 | Antrum or pylorus      | >3 | intestinal | moderately | + | - | + | - |
| 269 | - | ≤65 | 1 | 0 | Cardia, fundus or body | ≤3 | diffuse    | signet     | - | - | - | - |
| 270 | + | >65 | 3 | 1 | Cardia, fundus or body | ≤3 | intestinal | moderately | + | + | - | + |
| 271 | - | ≤65 | 1 | 0 | Cardia, fundus or body | ≤3 | diffuse    | signet     | - | - | - | + |
| 272 | - | >65 | 1 | 0 | Antrum or pylorus      | ≤3 | intestinal | well       | - | - | - | + |
| 273 | - | ≤65 | 2 | 2 | Cardia, fundus or body | ≤3 | diffuse    | signet     | + | - | - | - |
| 274 | + | >65 | 3 | 3 | Antrum or pylorus      | >3 | intestinal | poorly     | + | + | - | - |
| 275 | + | >65 | 4 | 3 | Antrum or pylorus      | >3 | diffuse    | signet     | + | - | - | + |
| 276 | - | ≤65 | 1 | 0 | Antrum or pylorus      | ≤3 | intestinal | moderately | - | - | - | + |
| 277 | + | >65 | 4 | 3 | Cardia, fundus or body | >3 | intestinal | moderately | + | - | - | + |
| 278 | - | ≤65 | 1 | 0 | Cardia, fundus or body | ≤3 | diffuse    | signet     | - | - | - | - |
| 279 | - | >65 | 4 | 3 | Antrum or pylorus      | ≤3 | intestinal | moderately | + | - | - | - |

LI, lymphatic invasion; VI, vascular invasion; PNI, perineural invasion; EBV, Epstein-Barr virus
